# Supplementary material for: Genome-Wide Characterization and Phylogenetic Analysis of GSK Genes in Maize and Elucidation of Their General Role in Interaction with BZR1
Source: MDPI journal article supplement (doi:10.3390/ijms23158056), 2022-07-22
Supplement: s1 [file s1]

## Supplementary

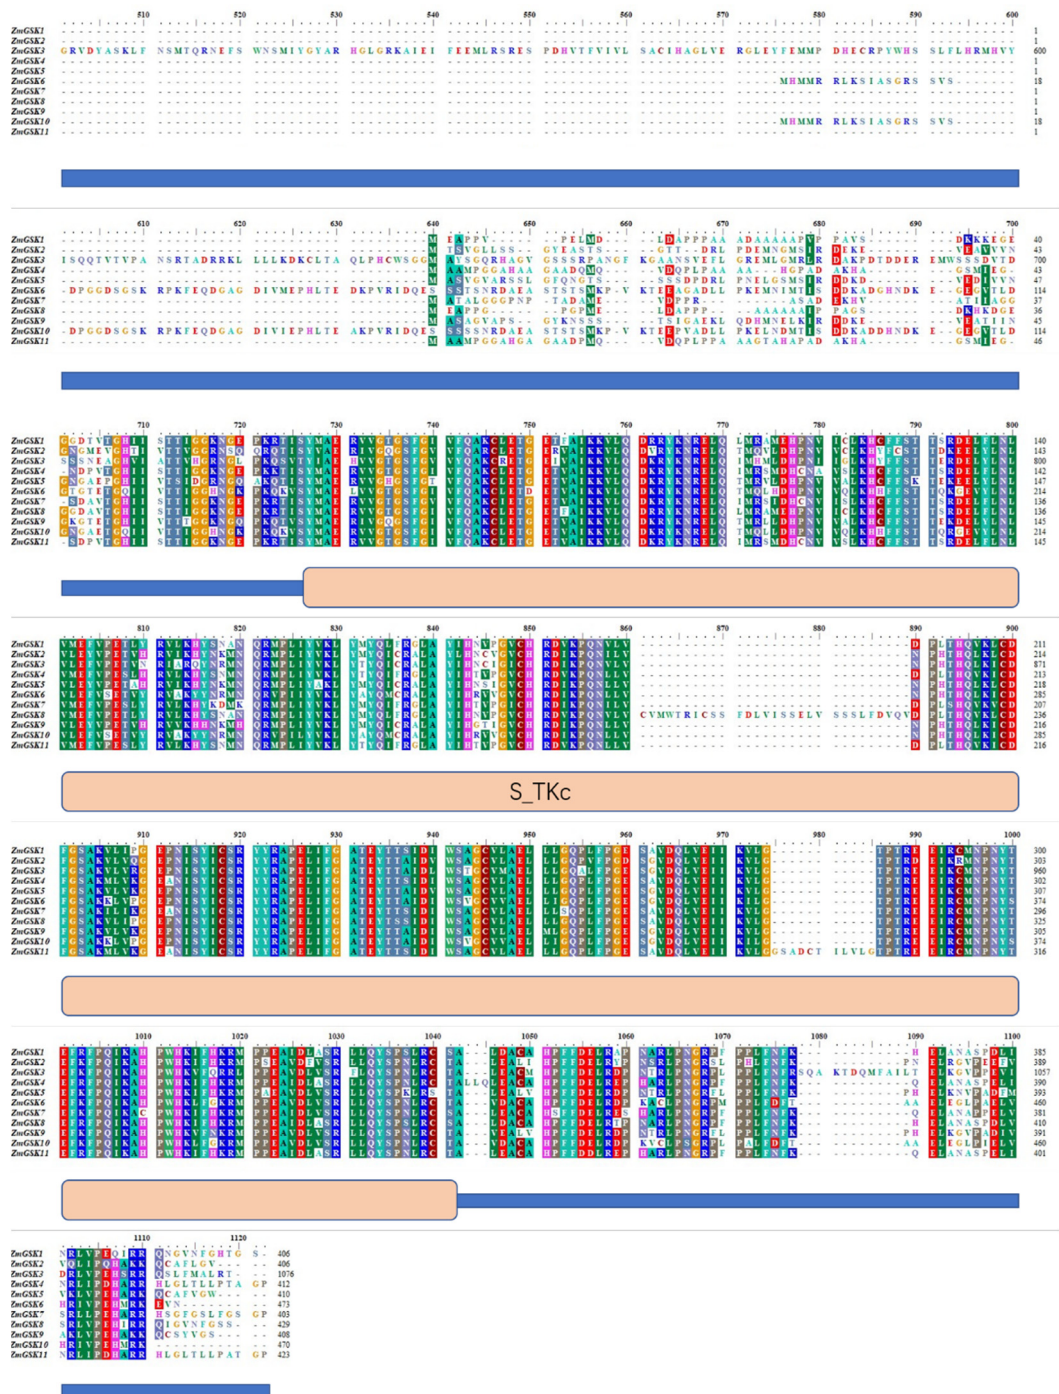

Figure S1 Sequence alignment analysis of maize GSK genes.

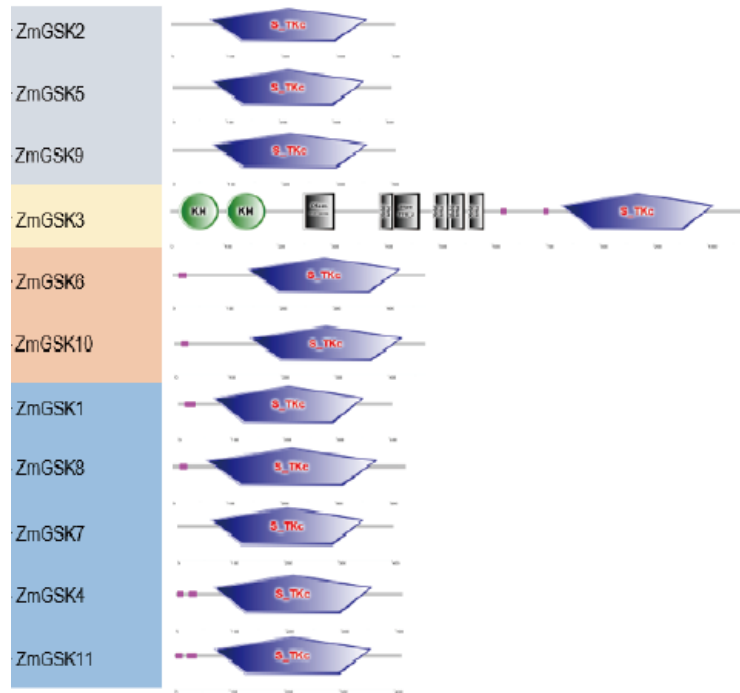

Figure S2 Conserved motif analysis of maize GSK genes.

Table S1. Conserved motifs in different maize GSK genes

| Motif Sequence |                                                    |
|----------------|----------------------------------------------------|
| motif_1        | TPTREEIRCMNPNYTEFKFPQIKAHPWHKIFHKRMPPEAVDLVSRLLQYS |
| motif_2        | THQLKICDFGSAKVLVKGEPNISYICSRYYRAPELIFGATEYTTAIDIWS |
| motif_3        | QTISYMAERVVGTGSFGIVFQAKCLETGETVAIKKVLQDKRYKNRELQTM |
| motif_4        | KHYNNMNQRMPLIYVKLYMYQICRALAYIHNVPGVCHRDIKPQNLLVBPH |
| motif_5        | RLLDHPNVVSLKHCFSTTSRDELYLNLVLEFVPETVYRVL           |
| motif_6        | ALEACAHPPFDELDPNARLPNGRPLPPLFNFK                   |
| motif_7        | GCVLAELLGQPLFPGESGVDQLVEIHKV                       |
| motif_8        | VEGVVIEGNGAETGHIISTTIGGKNGZPK                      |
| motif_9        | HELANAPPELVNRLVPEHARR                              |
| motif_10       | PNLRCT                                             |
| motif_11       | MHMMRRLKSIASGRSSVSDPGGDSGSKRPKFEQDGAGDIVIEPHLTEDKP |
| motif_12       | SYKPVKSTSAGADRLPDENMENSIRDDKE                      |
| motif_13       | AEAPPAPDPMZLDQPLPAAAA                              |
| motif_14       | VRIDQESSSSNRDAEASTST                               |
| motif_15       | MAAMPG                                             |

Table S2. Primers of GSK semi-quantitative RT-PCR and qRT-PCR

| Primer Sequence |                        |
|-----------------|------------------------|
| GSK1QF:         | TCAACAACGAGCAGGGACG    |
| GSK1QR:         | GGTTCACCAGGAATCAGGACTT |
| GSK2QF:         | ATGTGGCAGAGCGTATCGTG   |

|          |                           |
|----------|---------------------------|
| GSK2QR:  | CGCAGTTGTGAAGGTAAGCC      |
| GSK3QF:  | CTACAATGGCAATCTACAGGAGG   |
| GSK3QR:  | TGGTCTGGACTCTCTCTGCTG     |
| GSK4QF:  | GGTGTGTTGCCACAGGGATG      |
| GSK4QR:  | TCCACAGCACTTTCGCCA        |
| GSK5QF:  | TTGAAACTGGTGAGACCGTAGC    |
| GSK5QR:  | TGCCAAGGCTCTACAAATCTG     |
| GSK6QF:  | CCTGTGCGGATAGACCAAGA      |
| GSK6QR:  | TGTTCCAGTCCCATCAAGTGTA    |
| GSK7QF:  | TTCCCGTCTTCTTCAGTATTCG    |
| GSK7QR:  | CCGAATCCTGAATGCCGT        |
| GSK8QF:  | ATCGTCTTCCAGGCTAAGTGTC    |
| GSK8QR:  | TCTGGTTCGCATTGCTGTAGT     |
| GSK9QF:  | AGTGAGCAGCCAGAGAACAGG     |
| GSK9QR:  | TTATGTGCCCAGTTTCGGTC      |
| GSK10QF: | CTCTCGCTCTCCTCGGCTAA      |
| GSK10QR: | CTGCTCCATCCTGCTCAAAT      |
| GSK11QF: | TGGAGACTGGTGAGACTGTTGC    |
| GSK11QR: | GAGTGGCATCCTCTGGTTCA      |
| ACTINQF: | TCACTACGACTGCCGAGCGAG     |
| ACTINQR: | GAGCCACCACTGAGGACAACATTAC |

---

Table S3. Primers of clone GSK and BZR1

---

Primer Sequence

---

|         |                           |
|---------|---------------------------|
| GSK1F:  | CAAGCAGCCAAGCAGTGTGAAC    |
| GSK1R:  | CAATATCACCGTCACCTGCAATC   |
| GSK2F:  | ACCCGTCGATTGTAGTTGCTCAG   |
| GSK2R:  | ATGCTACTGTGCGTTAAACAGAAC  |
| GSK3F:  | ATGGAAGGCGTACCGCTCG       |
| GSK3R:  | CTAGGTCCTTAGCGCCATGAACA   |
| GSK4F:  | CGCCAAGAGAGAACAGGACACTAC  |
| GSK4R:  | GGTCAGATTCTACACCTTGAATTGC |
| GSK5F:  | CCTTGGACAGCAGTTTGTGCTG    |
| GSK5R:  | TCATCGAGTCGTCATCCTCTTATCC |
| GSK6F:  | TCTGAGGGAGGAGGATGCATATG   |
| GSK6R:  | CCGTCCACCTAATTCATTCTCCTTC |
| GSK7F:  | CACCGAGGAGAGAGAAGCCTGTC   |
| GSK7R:  | GCTACGGTCCACTCCCAAATAAG   |
| GSK8F:  | AGCGGCGTCTGAACTCTGAACC    |
| GSK8R:  | CTCCTAGCTGCTCCCGAAGTTGAC  |
| GSK9F:  | GAGGAGGTTACAGAGATGGCTTCAG |
| GSK9R:  | AAGGCACGGTCATCTCACGATC    |
| GSK10F: | CTGTGAGGGAGAAAGGATGCATATG |
| GSK10R: | ACCGGTTCACTTCCTCATGTGTTC  |
| GSK11F: | ACGGGAGAGAGGACGTTTCATTC   |

GSK11R: AGCCTTCGCCTATGGTCCAGTAG  
 BZR1F: GCTGCGTTCAGACGACCACT  
 BZR1F: AGAGGAGCACCGTCCGAATA

---

Table S4. Primers of GSKs ligate to pGBKT7 and BZR1 to pGADT7

| Primer Sequence |                                       |
|-----------------|---------------------------------------|
| GSK1BKF:        | TCAGAGGAGGACCTGCATATGATGGAGGCGCCGCCG  |
| GSK1BKR:        | CCGCTGCAGGTCGACGGATCCCTAGCTCCCGGTATG  |
| GSK2BKF:        | TCAGAGGAGGACCTGCATATGATGACATCAGTAGGT  |
| GSK2BKR:        | CCGCTGCAGGTCGACGGATCCTCAAACCTCCTAAGAA |
| GSK3BKF:        | TCAGAGGAGGACCTGCATATGATGGAAGGCGTACCG  |
| GSK3BKR:        | CCGCTGCAGGTCGACGGATCCCTAGGTCCTTAGCGC  |
| GSK4BKF:        | TCAGAGGAGGACCTGCATATGATGGCAGCCATGCCG  |
| GSK4BKR:        | CCGCTGCAGGTCGACGGATCCCTATGGTCCAGCGGT  |
| GSK5BKF:        | TCAGAGGAGGACCTGCATATGATGGCCTCGGTGGGC  |
| GSK5BKR:        | CCGCTGCAGGTCGACGGATCCTCACCACCCTACGAA  |
| GSK6BKF:        | TCAGAGGAGGACCTGCATATGATGCATATGATGCGG  |
| GSK6BKR:        | CCGCTGCAGGTCGACGGATCCCTAATTCACCTTCCTT |
| GSK7BKF:        | TCAGAGGAGGACCTGCATATGATGGCCACCGCGCTC  |
| GSK7BKR:        | CCGCTGCAGGTCGACGGATCCCTACGGTCCACTCCC  |
| GSK8BKF:        | TCAGAGGAGGACCTGCATATGATGGAGGCGCCGCCG  |
| GSK8BKR:        | CCGCTGCAGGTCGACGGATCCCTAGCTGCTCCCGAA  |
| GSK9BKF:        | TCAGAGGAGGACCTGCATATGATGGCTTCAGCTGGT  |
| GSK9BKR:        | CCGCTGCAGGTCGACGGATCCTCACGATCCAACATA  |
| GSK10BKF:       | TCAGAGGAGGACCTGCATATGATGCATATGATGCGG  |
| GSK10BKR:       | CCGCTGCAGGTCGACGGATCCTCACTTCCTCATGTG  |
| GSK11BKF:       | TCAGAGGAGGACCTGCATATGATGGCCGCCATGCCG  |
| GSK11BKR:       | CCGCTGCAGGTCGACGGATCCCTATGGTCCAGTAGC  |
| BZR1ADF:        | GTACCAGATTACGCTCATATGATGACGAGCGGCGCC  |
| BZR1ADR:        | CAGCTCGAGCTCGATGGATCCTCAGGAAGGATCTGC  |

Table S5. Primers of GSKs ligate to p2913 and BZR1 to p3086

| Primer Sequence |                                      |
|-----------------|--------------------------------------|
| 2913GSK1F:      | TCGAGCTCAAGCTTCGAATTCATGGAGGCGCCGCCG |
| 2913GSK1R:      | GCTCACCATCAGGATCCCGGGCTAGCTCCCGGTATG |
| 2913GSK3F:      | TCGAGCTCAAGCTTCGAATTCATGGAAGGCGTACCG |
| 2913GSK3R:      | GCTCACCATCAGGATCCCGGGCTAGGTCCTTAGCGC |
| 2913GSK4F:      | TCGAGCTCAAGCTTCGAATTCATGGCAGCCATGCCG |
| 2913GSK4R:      | GCTCACCATCAGGATCCCGGGCTATGGTCCAGCGGT |
| 2913GSK7F:      | TCGAGCTCAAGCTTCGAATTCATGGCCACCGCGCTC |
| 2913GSK7R:      | GCTCACCATCAGGATCCCGGGCTACGGTCCACTCCC |
| 2913GSK8F:      | TCGAGCTCAAGCTTCGAATTCATGGAGGCGCCGCCG |
| 2913GSK8R:      | GCTCACCATCAGGATCCCGGGCTAGCTGCTCCCGAA |

2913GSK11F: TCGAGCTCAAGCTTCGAATTCATGGCCGCCATGCCG  
2913GSK11R: GCTCACCATCAGGATCCCGGGCTATGGTCCAGTAGC  
3086BZR1F: TCGAGCTCAAGCTTCGAATTCATGACGAGCGGCGCC  
3086BZR1R: CACGCTGCCCAGGATCCCGGGTCAGGAAGGATCTGC

---
